# Supplementary material for: Supraphysiologic doses of 17β-estradiol aggravate depression-like behaviors in ovariectomized mice possibly via regulating microglial responses and brain glycerophospholipid metabolism
Source: PubMed Central journal article supplement (PMC10485970; doi:10.1186/s12974-023-02889-5), 2023-09-07

Figure 3E

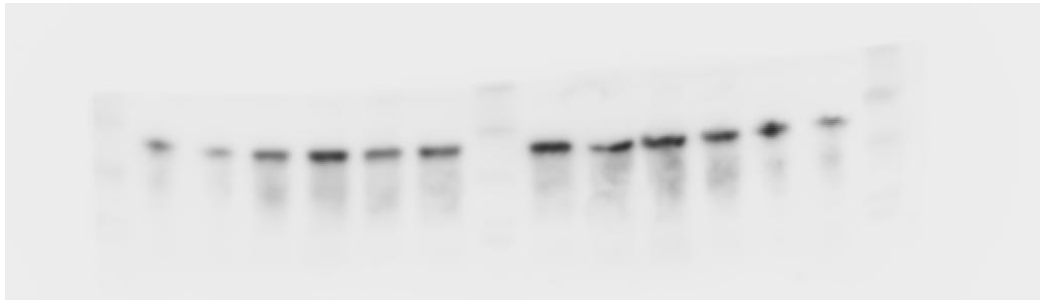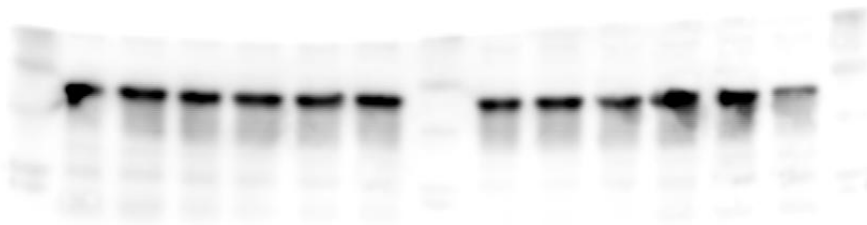

Figure 4B and F

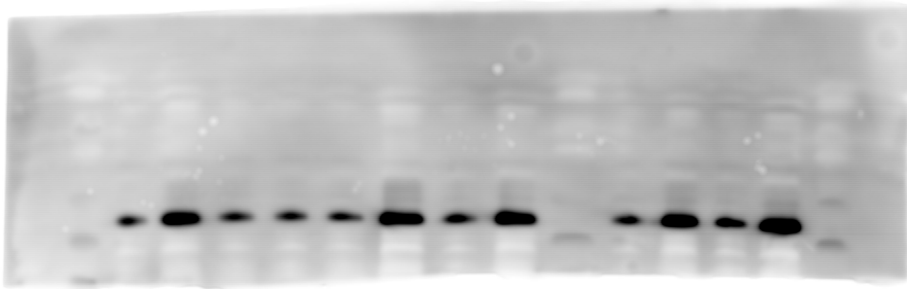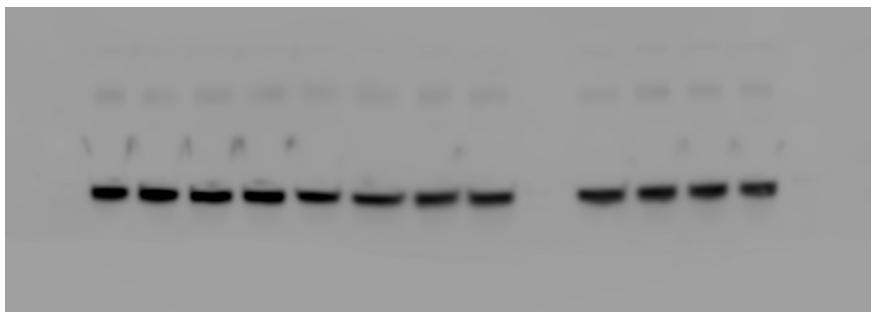

Figure 4C

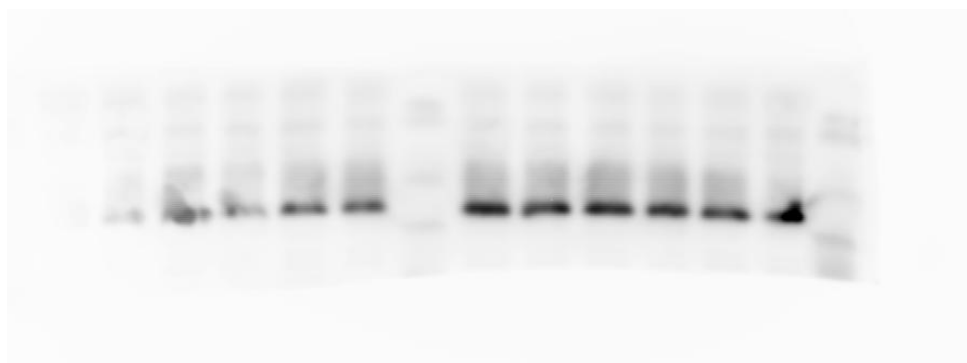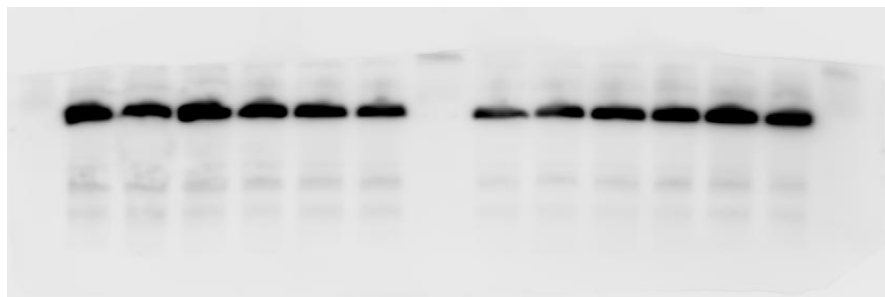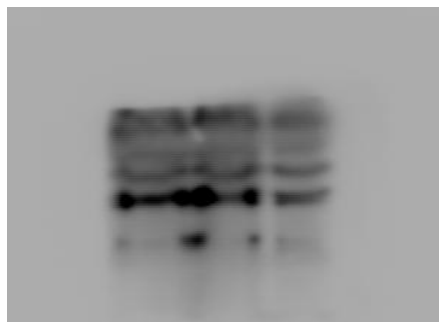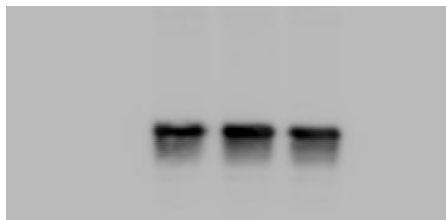

Supplement: 12974_2023_2889_MOESM5_ESM.pdf [file 12974_2023_2889_MOESM5_ESM.pdf]
